# Supplementary material for: A non-invasive method to determine the pluripotent status of stem cells by culture medium microRNA expression detection
Source: PubMed Central journal article supplement (PMC4772130; doi:10.1038/srep22380), 2016-03-01
Supplement: srep22380-s1.pdf [file srep22380-s1.pdf]

**A non-invasive method to determine the pluripotent status of stem cells by  
culture medium microRNA expression detection**

Ying Zhang, Gui-Hai Feng, Kai Xu, Libin Wang, Peng Cui, Yuhuan Li, Chenxin Wang, Fei  
Teng, Jie Hao, Hai-Feng Wan, Yuanqing Tan, Xiu-Jie Wang and Qi Zhou

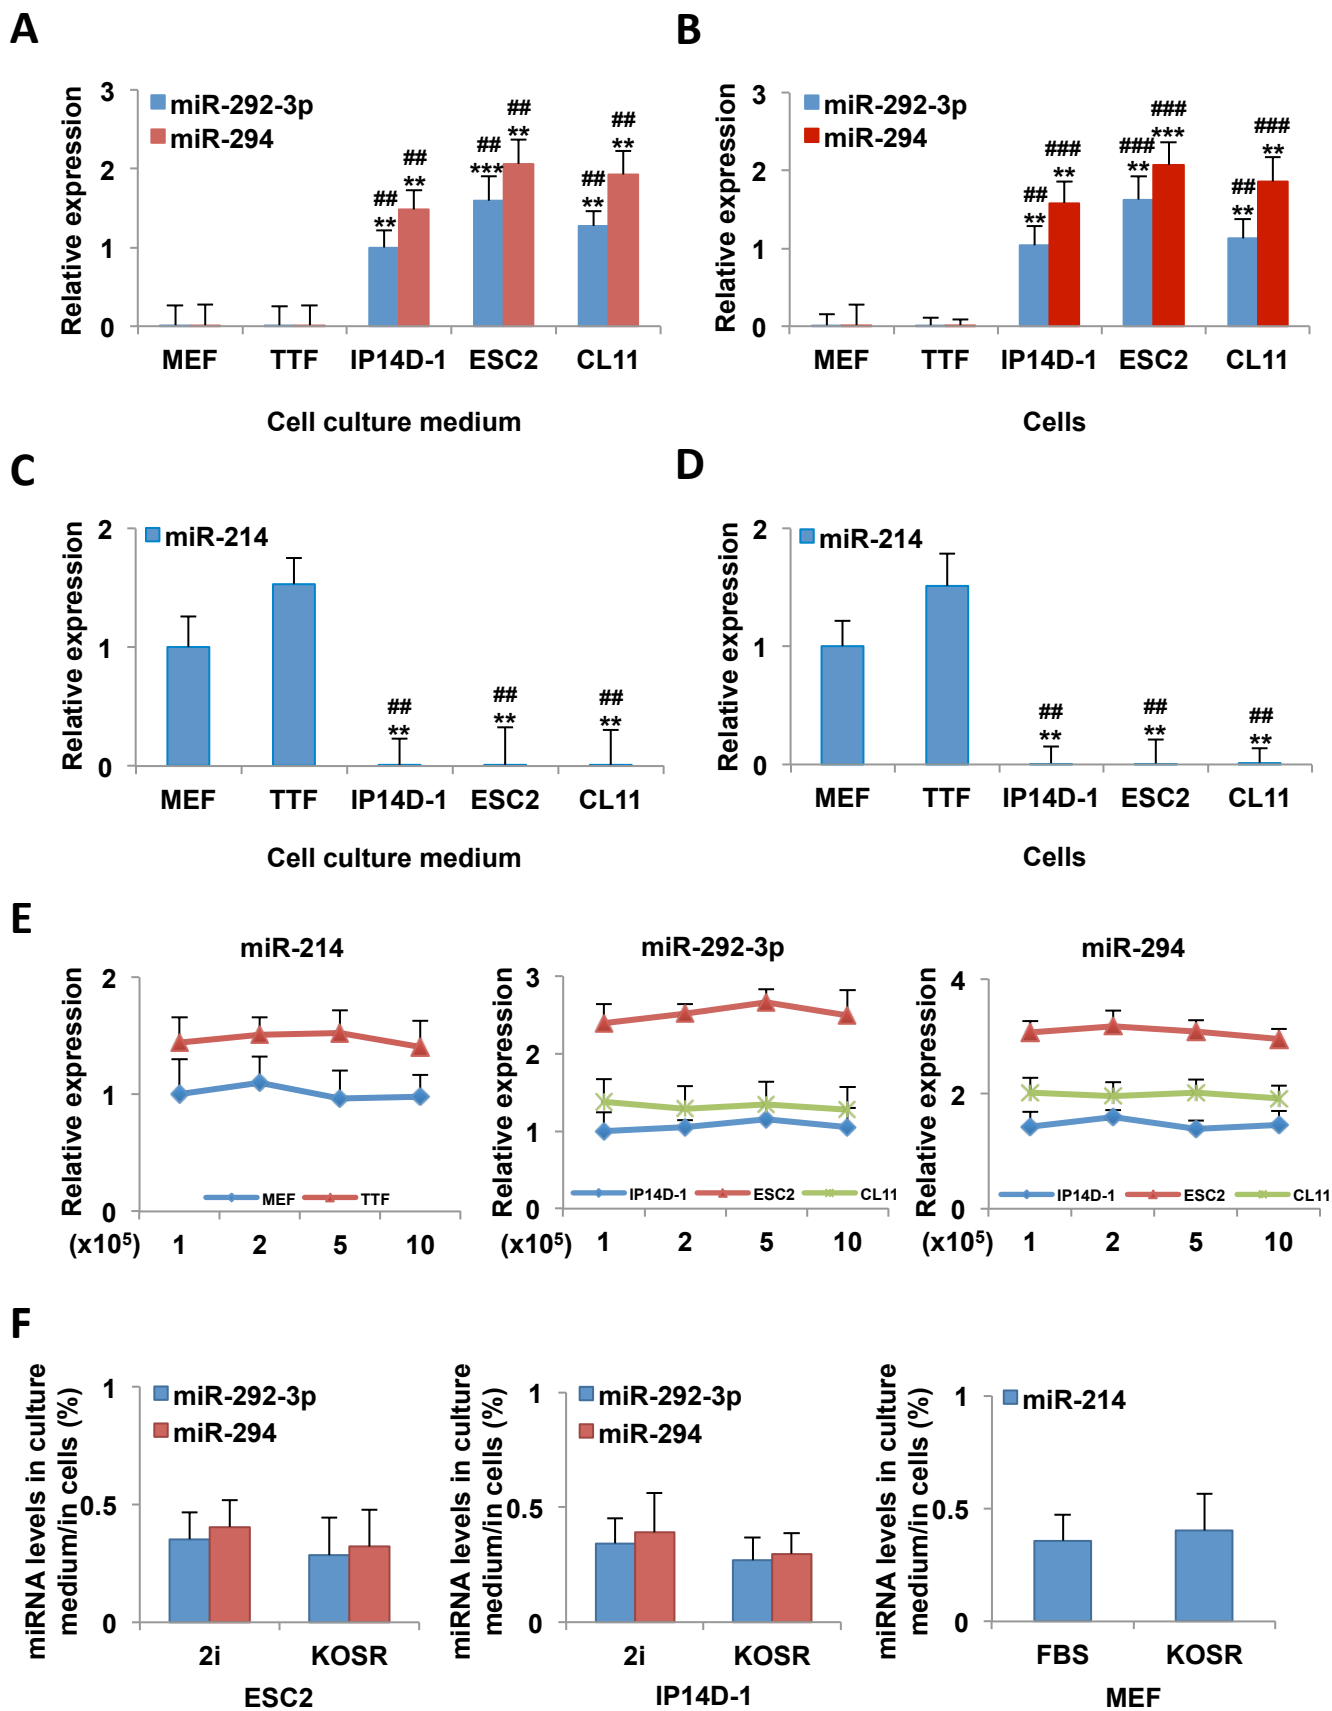

**Figure S1. MiRNA expression abundance in mouse cells and cell culture mediums. (A)**

Relative expression levels of miRNA-292-3p and miRNA-294 in cell culture mediums. **(B)**

Relative expression levels of miRNA-292-3p and miRNA-294 in cells. **(C)** Relative

expression levels of miRNA-214 in cell culture mediums. **(D)** Relative expression levels of

miRNA-214 in cells. **(E)** Relative expression levels of miRNA-214 (left), miRNA-292-3p

(middle) and miRNA-294 (right) in cell culture mediums with different ( $1, 2, 5, 10 \times 10^5$  cells

per 6 cm dish) cell density. **(F)** The ratio of the miRNA-292-3p and miRNA-294 amount in

culture mediums to that in ESCs (ESC2) under 2i and KOSR culture conditions (left). The

ratio of the miRNA-292-3p and miRNA-294 amount in culture mediums to that in iPSCs

(IP14D-1) under 2i and KOSR culture conditions (middle). The ratio of the miRNA-214

amount in culture mediums to that in MEFs under FBS and KOSR culture conditions (right).

The miRNA expression in all experiments was evaluated by real-time PCR.

\*\*  $P < 0.01$ , \*\*\* $P < 0.001$ , compared to MEF, ##  $P < 0.01$ , ### $P < 0.001$ , compared to TTF,

the Student's t-test. All the data represent three independent experiments.

**A**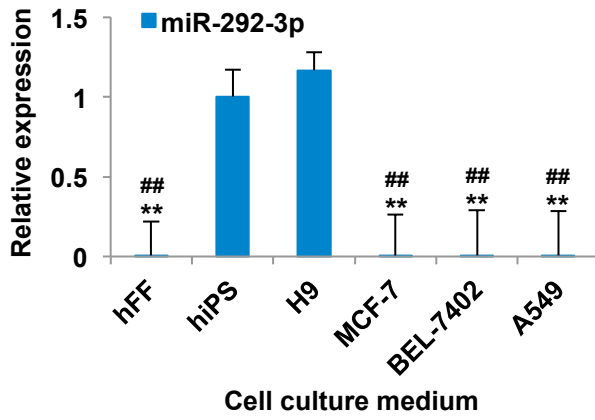**B**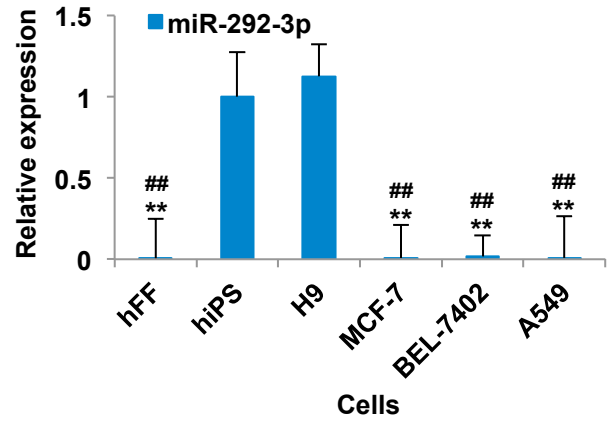**C**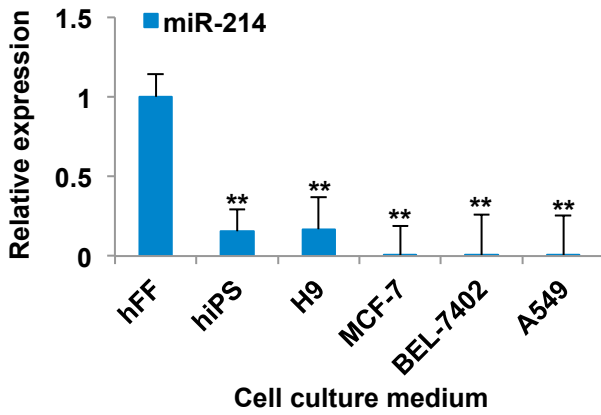**D**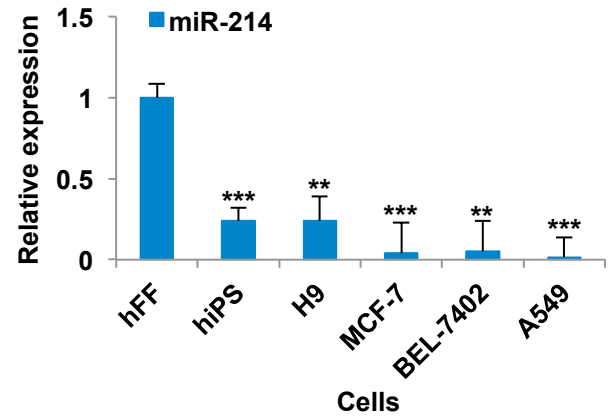

**Figure S2. MiRNA expression detection in human cells and cell culture mediums. (A)**

Relative expression levels of an ESC/iPSC specific miRNA, miRNA-292-3p, in the cell culture mediums. **(B)** Relative expression levels of miRNA-292-3p in cells. **(C)** Relative expression levels of a fibroblast highly expressed miRNA, miRNA-214, in cell culture mediums. **(D)** Relative expression levels of miRNA-214 in cells. The miRNA expression in all experiments was evaluated by real-time PCR.

\*\* P < 0.01, \*\*\*P < 0.001, compared to human iPSC, ## P < 0.01, compared to H9, the Student's t-test. All the data represent three independent experiments.
